# Supplementary material
Source: PubMed Central journal article supplement (PMC3051037)
Supplement: NIHMS264940-supplement-1_si_001.pdf [file NIHMS264940-supplement-1_si_001.pdf]

**Table S1. Oligodeoxyribonucleotides used in this study.**

| Oligo | Sequence                                                                            | Purpose                                |
|-------|-------------------------------------------------------------------------------------|----------------------------------------|
| 1     | 5'-GAG AAA TTA ACT ATG <b>GCG GCG GCG</b> TGT GAA ATG<br>AAA CGC ACC ACA CTG-3'     | Encodes DKD(2-4)-<br>AAA mutation.     |
| 2     | 5'-GAG AAA TTA ACT ATG GAC <b>GCG GCG GCG</b> GAA ATG<br>AAA CGC ACC ACA CTG-3'     | Encodes KDC(3-5)-<br>AAA mutation.     |
| 3     | 5'-G GAG AAA TTA ACT ATG GAC AAG <b>GCG GCG GCG</b> ATG<br>AAA CGC ACC ACA CTG G-3' | Encodes DCE(4-6)-<br>AAA mutation.     |
| 4     | 5'-G GAG AAA TTA ACT ATG GAC AAG GAT <b>GCG GCG GCG</b><br>AAA CGC ACC ACA CTG G-3' | Encodes CEM(5-7)-<br>AAA mutation.     |
| 5     | 5'-G GAG 5'-GG CTA GCC <b>GCG GCG GCG</b> TGG CTT CTG<br>GCC CAT G-3'               | Encodes VKE(164-<br>166)-AAA mutation. |
| 6     | 5'-GGA GGG CTA GCC GTG <b>GCG GCG GCG</b> CTT CTG GCC<br>CAT G-3'                   | Encodes KEW(165-<br>167)-AAA mutation. |
| 7     | 5'-G GGC 5'-TA GCC GTG AAG <b>GCG GCG GCG</b> CTG GCC<br>CAT GAA GG-3'              | Encodes EWL to<br>AAA mutation.        |
| 8     | 5'-TA GCC GTG AAG GAA <b>GCG GCG GCG</b> GCC CAT GAA<br>GGC CAC CG-3'               | Encodes WLL(167-<br>169)-AAA mutation. |
| 9     | 5'-AGT CAG TCA GTC AGT CAG TCA GTC AG-3'                                            | Binding substrate.                     |
| 10    | 5'-CTG ACT GAC TGA CTG ACT GAC TGA CT-3'                                            | Binding substrate.                     |

**Table S2. Circular dichroism secondary structure analysis<sup>a</sup>**

| AGT Protein      | Algorithm | H(tot) <sup>b</sup> | S(tot) <sup>b</sup> | Turn <sup>b</sup> | UO <sup>b</sup> |
|------------------|-----------|---------------------|---------------------|-------------------|-----------------|
| Wild-type        | Selcon 3  | 20                  | 30                  | 20                | 29              |
|                  | Continll  | 23                  | 25                  | 19                | 32              |
| KDC(3-5)-AAA     | Selcon 3  | 18                  | 30                  | 19                | 27              |
|                  | Continll  | 22                  | 26                  | 19                | 33              |
| DCE(4-6)-AAA     | Selcon 3  | c                   | c                   | c                 | c               |
|                  | Continll  | 5.7                 | 39                  | 21                | 35              |
| CEM(5-7)-AAA     | Selcon 3  | 19.2                | 25.5                | 18                | 25              |
|                  | Continll  | 19.5                | 29                  | 19                | 32              |
| VKE(164-166)-AAA | Selcon 3  | 22                  | 30                  | 19                | 28              |
|                  | Continll  | 23                  | 25                  | 20                | 32              |
| KEW(165-167)-AAA | Selcon 3  | 13                  | 36                  | 17                | 23              |
|                  | Continll  | 16.5                | 27.4                | 18                | 38              |
| EWL(166-168)-AAA | Selcon 3  | 11                  | 40                  | 18                | 26              |
|                  | Continll  | 17                  | 29                  | 18                | 36              |

a. Values obtained using Contin/LL and Selcon3 algorithms implemented in the CDpro program, using the SDP48 basis set (22,23).

b. Percent of residues in each conformation.  $H(\text{tot}) = H(\text{R}) + H(\text{D})$ , where  $H(\text{R})$  is the percent in “regular” helix and  $H(\text{D})$  is the percent in “distorted” helix estimated by the program.  $S(\text{tot}) = S(\text{R}) + S(\text{D})$ , where  $S(\text{R})$  is the percent in “regular” sheet and  $S(\text{D})$  is the percent in “distorted” sheet estimated by the program. Turn refers to the fraction in b-turn conformation; UO is the percent that cannot be assigned other major secondary structures. The normalized mean root square derivation between calculated and experimental spectra was in the range of 2.3-5.5 %.

c. Calculation failed to converge.

Figure S1

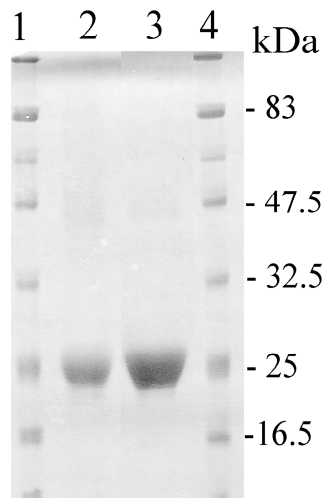

**Figure S1. SDS-polyacrylamide gel electrophoresis of representative AGT preparations.** SDS-PAGE gels (15% acrylamide) were prepared and run as described (29) and stained with coomassie blue R-250. Lanes 1 and 4 contain molecular weight standards. Lane 2 contains wild-type AGT (20 $\mu$ g). Lane 3 contains AGT-mutant KDC(3-5)-AAA (35 $\mu$ g). Molecular weights of standards (in units of KDa) are given in the margin.

Figure S2

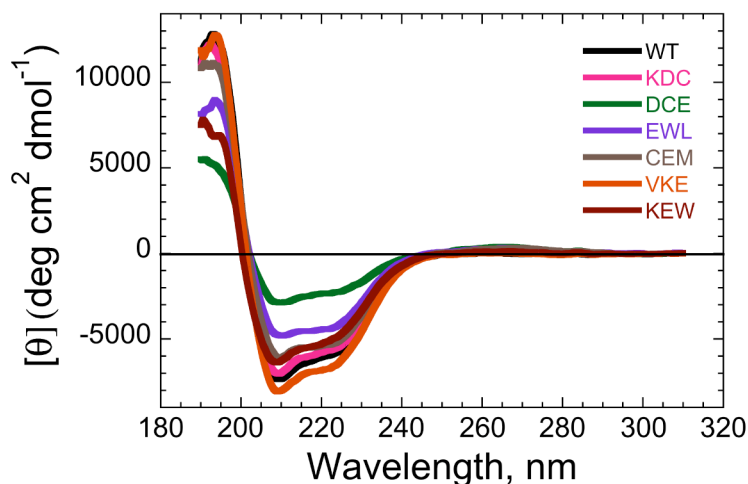

**Figure S2. Circular dichroism spectra of wild-type and mutant AGT proteins.** Spectra were obtained at 4 $^{\circ}$ C, using a cell with a path length of 0.02 cm. Samples contained wild-type or mutant protein at concentrations of  $\sim$ 0.19 mg/ml ( $\sim$ 9  $\mu$ M) dissolved in 50 mM sodium phosphate (pH 7.5 at 4 $^{\circ}$ C). Each spectrum is the average of twenty consecutive scans.
